# Supplementary material for: Unplanned return presentations of older patients to the emergency department: a root cause analysis
Source: PubMed Central journal article supplement (PMC7510142; doi:10.1186/s12877-020-01770-x), 2020-09-22
Supplement: 12877_2020_1770_MOESM1_ESM.pdf [file 12877_2020_1770_MOESM1_ESM.pdf]

## Interview guide-patient

|                                                                      |                                                                                                                       |
|----------------------------------------------------------------------|-----------------------------------------------------------------------------------------------------------------------|
| Number participant                                                   | .....                                                                                                                 |
| Age                                                                  | ..... years                                                                                                           |
| Gender                                                               | 0 = man<br>1 = woman                                                                                                  |
| Shared household                                                     | 0 = no (alone)<br>1 = yes (married or living together)                                                                |
| Living situation                                                     | 0 = independent<br>1 = sheltered housing<br>2 = supportive care facility<br>3 = nursing home<br>4 = revalidation home |
| Help with household activities                                       | 0 = no<br>1 = family member or caregiver<br>2 = domestic help                                                         |
| Frequency help with household activities                             | ..... times per week                                                                                                  |
| Home nursing                                                         | 0 = no<br>1 = yes                                                                                                     |
| Frequency of home nursing                                            | ..... times per week                                                                                                  |
| Number of medications patient uses                                   | .....                                                                                                                 |
| Number of comorbidities patient                                      | .....                                                                                                                 |
| Frequency of hospital admissions year prior to this ED presentations | ..... times                                                                                                           |
| Frequency of ED presentations year prior to this ED presentations    | ..... times                                                                                                           |
| Frequency of GP visits yea prior to this ED presentations            | ..... times                                                                                                           |
| Frequency of specialist visits year prior to this ED presentations   | ..... times                                                                                                           |



**Interview guide-doctor at ED**

What is in your opinion the reason of this return presentation at the ED of this patient? .....

Is the ED the most appropriate location for this patient? 0 = no  
1 = yes

Is this ED return presentation appropriate? 0 = no  
1 = yes

Could the patient have been treated at a different location than the ED? .....

Was this ED return presentation potential preventable? 0 = no answer  
1 = I don't know  
2 = no  
3 = yes

In which way could this ED return presentation potentially be prevented? .....

**Interview guide-GP**

Is the ED the most appropriate location for this patient?

0 = no  
1 = yes

Is this ED return presentation appropriate?

0 = no  
1 = yes

Was this ED return presentation potential preventable?

0 = no answer  
1 = I don't know  
2 = no  
3 = yes

In which way could this ED return presentation potentially be prevented?

.....  
.....  
.....  
.....

Could the patient have been treated at a different location than the ED?

.....  
.....  
.....  
.....

Was there an adequate discharge plan after the initial ED presentation?

0= no  
1= yes

Was there an follow-up appointment at the hospital or at the GP after the initial ED presentation?

0 = no  
1 = yes, explanation:

.....  
.....  
.....  
.....

Were you aware of the patients health status after the initial ED presentation?

0 = no  
1 = yes

Use of preventive diagnostics

0 = no  
1 = yes

Type of preventive diagnostics

0 = blood tests  
1 = control appointment  
2 = other:.....

Frequency of preventive diagnostics ..... times a year

Does the patient have comorbidities? 0 = no  
1 = yes; number of comorbidities: .....

Number of medications patient uses .....

Is the patient monitored by the GP, if yes on what way? 0 = no  
1 = yes, explanation:  
.....  
.....  
.....  
.....

How is the patients mobility? .....  
.....  
.....  
.....

Is there an increased risk of falling? 0 = no  
1 = yes

Does the patient have cognitive impairments? 0 = no  
1 = yes

What is the patients living situation, is it stable, is the patient receiving home care of help with house hold activities? .....  
.....  
.....  
.....
